# Supplementary material for: Submicronic calcite particles with controlled morphology tailored by polymer skeletons via carbonation route with compressed or supercritical CO2
Source: Royal Society of Chemistry journal article supplement (doi:10.1039/b914787j), 2009-01-01
Supplement: b914787j.pdf [file b914787j.pdf]

## Supporting Information

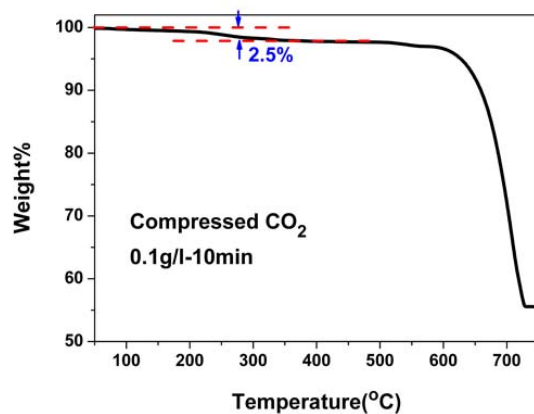

**Figure S1.** TGA curve of CaCO<sub>3</sub> particles obtained under control of 0.1g/l NaCMC after 10min reaction.

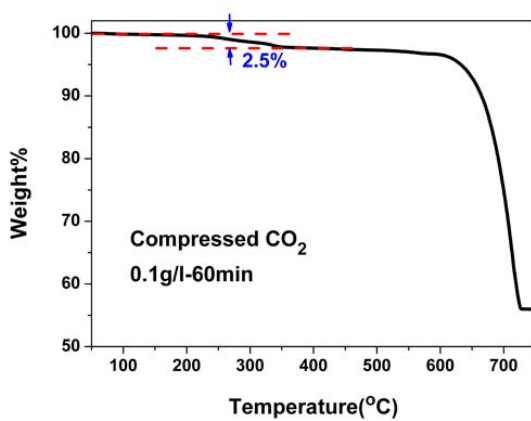

**Figure S2.** TGA curve of CaCO<sub>3</sub> particles obtained under control of 0.1g/l NaCMC after 60min reaction.

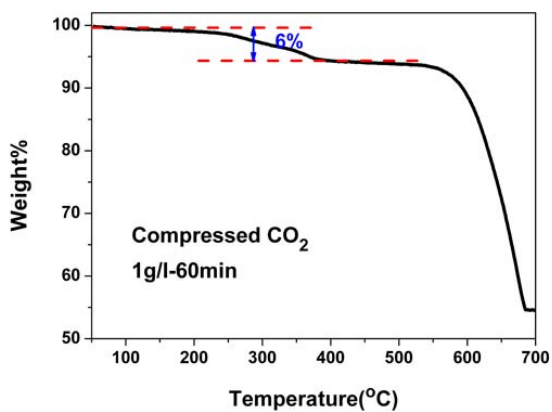

**Figure S3.** TGA curve of CaCO<sub>3</sub> particles obtained under control of 1g/l NaCMC after 60min reaction.

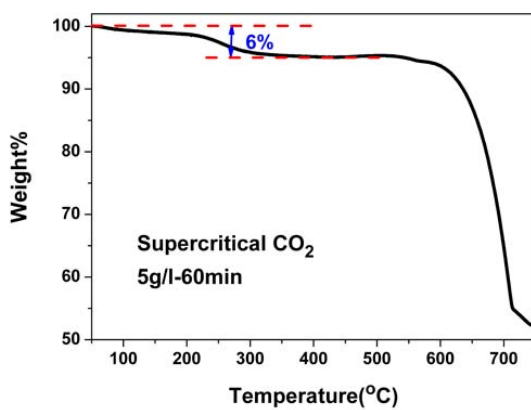

**Figure S4** TGA curve of CaCO<sub>3</sub> particles obtained under control of 5g/l NaCMC after 60min reaction in scCO<sub>2</sub>.
